# Supplementary material for: Correlation between B7-H4 and Survival of Non-Small-Cell Lung Cancer Patients Treated with Nivolumab
Source: PubMed Central journal article supplement (PMC6832616; doi:10.3390/jcm8101566), 2019-10-01
Supplement: jcm-08-01566-s001.pdf [file jcm-08-01566-s001.pdf]

Supplementary Tables

**Supplementary Table S1.** Distribution of the biomarker expression among the samples collected from each patient within the Nivolumab Cohort. For each marker the positive tumor cells (%) and the intensity were reported. The percentage of stained tumor cells were arbitrarily graded as follows: <1% (negative), 1%–9% (low expression), 10%–49% (moderate expression), ≥50% (high expression), whereas the intensity of staining was categorized as follows: absent (0), weak (1+), moderate (2+), and strong (3+). ND: not determined.

| PATIENT ID | PD-L1         |           | PD-L2         |           | PD-1          |           | B7-H3         |           | B7-H4         |           |
|------------|---------------|-----------|---------------|-----------|---------------|-----------|---------------|-----------|---------------|-----------|
|            | % Tumor Cells | Intensity | % Tumor Cells | Intensity | % Tumor Cells | Intensity | % Tumor Cells | Intensity | % Tumor Cells | Intensity |
| 1          | <1%           | 0         | 10%–49%       | 2+        | <1%           | 0         | <1%           | 0         | <1%           | 0         |
| 2          | <1%           | 0         | <1%           | 0         | 1%–9%         | 1+        | <1%           | 0         | 1%–9%         | 1+        |
| 3          | <1%           | 0         | <1%           | 0         | 1%–9%         | 2+        | <1%           | 0         | ≥50%          | 2+        |
| 4          | <1%           | 0         | <1%           | 0         | 10%–49%       | 1+        | <1%           | 0         | <1%           | 0         |
| 5          | <1%           | 0         | <1%           | 0         | ≥50%          | 3+        | <1%           | 0         | <1%           | 0         |
| 6          | <1%           | 0         | <1%           | 0         | ≥50%          | 3+        | 10%–49%       | 1+        | ≥50%          | 3+        |
| 7          | <1%           | 0         | <1%           | 0         | ≥50%          | 2+        | <1%           | 0         | ≥50%          | 1+        |
| 8          | <1%           | 0         | <1%           | 0         | <1%           | 0         | <1%           | 0         | <1%           | 0         |
| 9          | <1%           | 0         | <1%           | 0         | <1%           | 0         | 10%–49%       | 1+        | <1%           | 0         |
| 10         | <1%           | 0         | <1%           | 0         | <1%           | 0         | <1%           | 0         | <1%           | 0         |
| 11         | 1%–9%         | 2+        | <1%           | 0         | 1%–9%         | 1+        | <1%           | 0         | 1%–9%         | 1+        |
| 12         | <1%           | 0         | <1%           | 0         | ≥50%          | 3+        | 1%–9%         | 1+        | <1%           | 0         |
| 13         | <1%           | 0         | <1%           | 0         | <1%           | 0         | <1%           | 0         | <1%           | 0         |
| 14         | <1%           | 0         | <1%           | 0         | 1%–9%         | 1+        | <1%           | 0         | <1%           | 0         |
| 15         | <1%           | 0         | <1%           | 0         | ≥50%          | 0         | <1%           | 0         | <1%           | 0         |
| 16         | ≥50%          | 3+        | <1%           | 0         | ≥50%          | 2+        | <1%           | 0         | ≥50%          | 1+        |
| 17         | <1%           | 0         | <1%           | 0         | 10%–49%       | 2+        | <1%           | 0         | ≥50%          | 3+        |
| 18         | <1%           | 0         | <1%           | 0         | ≥50%          | 2+        | <1%           | 0         | 10%–49%       | 1+        |
| 19         | <1%           | 0         | <1%           | 0         | ≥50%          | 1+        | <1%           | 0         | <1%           | 0         |
| 20         | <1%           | 0         | <1%           | 0         | ND            | ND        | ≥50%          | 3+        | 1%–9%         | 1+        |
| 21         | <1%           | 0         | <1%           | 0         | 10%–49%       | 2+        | 10%–49%       | 1+        | 10%–49%       | 1+        |
| 22         | <1%           | 0         | <1%           | 0         | 1%–9%         | 1+        | <1%           | 0         | ≥50%          | 1+        |
| 23         | <1%           | 0         | 1%–9%         | 1+        | 10%–49%       | 2+        | <1%           | 0         | <1%           | 0         |
| 24         | <1%           | 0         | <1%           | 0         | <1%           | 0         | <1%           | 0         | <1%           | 0         |
| 25         | <1%           | 0         | 10%–49%       | 1+        | <1%           | 0         | <1%           | 0         | <1%           | 0         |
| 26         | 1%–9%         | 1+        | <1%           | 0         | ≥50%          | 1+        | <1%           | 0         | <1%           | 0         |
| 27         | 10%–49%       | 2+        | 10%–49%       | 1+        | ≥50%          | 2+        | <1%           | 0         | 10%–49%       | 1+        |
| 28         | <1%           | 0         | <1%           | 0         | <1%           | 0         | <1%           | 0         | <1%           | 0         |

|    |         |    |         |    |         |    |       |    |         |    |
|----|---------|----|---------|----|---------|----|-------|----|---------|----|
| 29 | <1%     | 0  | <1%     | 0  | ≥50%    | 2+ | <1%   | 0  | <1%     | 0  |
| 30 | <1%     | 0  | <1%     | 0  | ≥50%    | 1+ | <1%   | 0  | <1%     | 0  |
| 31 | 1%–9%   | 1+ | <1%     | 0  | ≥50%    | 3+ | <1%   | 0  | <1%     | 0  |
| 32 | <1%     | 0  | <1%     | 0  | <1%     | 0  | <1%   | 0  | <1%     | 0  |
| 33 | <1%     | 0  | <1%     | 0  | <1%     | 0  | <1%   | 0  | ≥50%    | 2+ |
| 34 | <1%     | 0  | <1%     | 0  | 1%–9%   | 1+ | <1%   | 0  | <1%     | 0  |
| 35 | <1%     | 0  | <1%     | 0  | 1%–9%   | 1+ | <1%   | 0  | <1%     | 0  |
| 36 | 1–9%    | 1+ | <1%     | 0  | ≥50%    | 3+ | <1%   | 0  | <1%     | 0  |
| 37 | <1%     | 0  | 1%–9%   | 1+ | 1%–9%   | 1+ | <1%   | 0  | <1%     | 0  |
| 38 | <1%     | 0  | 10%–49% | 1+ | <1%     | 0  | <1%   | 0  | <1%     | 0  |
| 39 | 10%–49% | 3+ | <1%     | 0  | 10%–49% | 1+ | <1%   | 0  | ≥50%    | 2+ |
| 40 | <1%     | 0  | <1%     | 0  | ND      | ND | <1%   | 0  | <1%     | 0  |
| 41 | <1%     | 0  | <1%     | 0  | <1%     | 0  | 1%–9% | 1+ | 1–9%    | 1+ |
| 42 | ND      | ND | <1%     | 0  | ≥50%    | 2+ | <1%   | 0  | <1%     | 0  |
| 43 | <1%     | 0  | <1%     | 0  | ≥50%    | 2+ | <1%   | 0  | 1–9%    | 1+ |
| 44 | <1%     | 0  | <1%     | 0  | <1%     | 0  | <1%   | 0  | <1%     | 0  |
| 45 | <1%     | 0  | ≥50%    | 2+ | ≥50%    | 3+ | <1%   | 0  | <1%     | 0  |
| 46 | <1%     | 0  | 10%–49% | 1+ | ≥50%    | 1+ | <1%   | 0  | 10%–49% | 1+ |

**Supplementary Table S2.** Overall outcome data in the Nivolumab Cohort. Among the patients from the Nivolumab Cohort, one was considered evaluable for irRC, but not for RECIST, based on measurable lesions; one additional patient was considered not evaluable as he/she discontinued treatment and did not undergo further CT scans after baseline; both patients were followed for overall survival.

| <b>NIVOLUMAB COHORT N = 46</b>    |                       |                      |
|-----------------------------------|-----------------------|----------------------|
|                                   | <b>Recist</b>         | <b>irRC</b>          |
| <b>Evaluable patients for PFS</b> | N = 44                | N = 45               |
| <b>Median PFS (95% CI)</b>        | 1.9 months (1.7–2.2)  | 1.9 months (1.7–2.9) |
| <b>ORR</b>                        | 14.0%                 | 13.6%                |
| <b>DCR</b>                        | 27.9%                 | 38.6%                |
| <b>Median OS (95% CI)</b>         | 8.9 months (4.4–12.2) |                      |

Among the patients who were evaluable for PFS, one missed the first scheduled response assessment, although subsequent scans were available for PFS; hence, this patient was excluded from ORR and DCR analysis.

**Supplementary Table S3.** Distribution of the biomarkers expression among the samples collected from each patient within the Chemotherapy Cohort. For each marker the positive tumor cells (%) and the intensity were reported. The percentage of stained tumor cells were arbitrarily graded as follows: <1% (negative), 1%–9% (low expression), 10%–49% (moderate expression), ≥50% (high expression), whereas the intensity of staining was categorized as follows: absent (0), weak (1+), moderate (2+), and strong (3+).

| <b>PATIENT ID</b> | <b>PD-L1</b>         |                  | <b>B7-H4</b>         |                  |
|-------------------|----------------------|------------------|----------------------|------------------|
|                   | <b>% Tumor Cells</b> | <b>Intensity</b> | <b>% Tumor Cells</b> | <b>Intensity</b> |
| 1                 | <1%                  | 0                | 10%–49%              | 2+               |
| 2                 | <1%                  | 0                | ≥50%                 | 3+               |
| 3                 | <1%                  | 0                | ≥50%                 | 2+               |
| 4                 | <1%                  | 0                | ≥50%                 | 1+               |
| 5                 | 1%–9%                | 1+               | 1–9%                 | 1+               |
| 6                 | <1%                  | 0                | <1%                  | 0                |
| 7                 | <1%                  | 0                | <1%                  | 0                |
| 8                 | <1%                  | 0                | <1%                  | 0                |
| 9                 | <1%                  | 0                | 1%–9%                | 1+               |
| 10                | <1%                  | 0                | ≥50%                 | 3+               |
| 11                | <1%                  | 0                | ≥50%                 | 2+               |
| 12                | <1%                  | 0                | <1%                  | 0                |
| 13                | 10%–49%              | 1+               | <1%                  | 0                |
| 14                | 1–9%                 | 1+               | ≥50%                 | 2+               |
| 15                | <1%                  | 0                | 10%–49%              | 2+               |
| 16                | <1%                  | 0                | ≥50%                 | 1+               |
| 17                | <1%                  | 0                | <1%                  | 0                |
| 18                | <1%                  | 0                | 1–9%                 | 3+               |
| 19                | <1%                  | 0                | 10%–49%              | 2+               |
| 20                | 1%–9%                | 1+               | <1%                  | 0                |
| 21                | <1%                  | 0                | <1%                  | 0                |
| 22                | <1%                  | 0                | ≥50%                 | 2+               |
| 23                | <1%                  | 0                | <1%                  | 0                |
| 24                | <1%                  | 0                | <1%                  | 0                |
| 25                | 1%–9%                | 1+               | ≥50%                 | 2+               |
| 26                | 1%–9%                | 1+               | <1%                  | 0                |
| 27                | <1%                  | 0                | <1%                  | 0                |

Supplementary Table S4. Global outcome data in the Chemotherapy Cohort.

| CHEMOTHERAPY COHORT N = 27 |                       |
|----------------------------|-----------------------|
| Evaluable patients for PFS | N = 27                |
| Median PFS (95% CI)        | 3.3 months (2.4–6.7)  |
| ORR                        | 18.5%                 |
| DCR                        | 74.1%                 |
| Median OS (95% CI)         | 8.3 months (4.3–13.2) |

Supplementary Figures

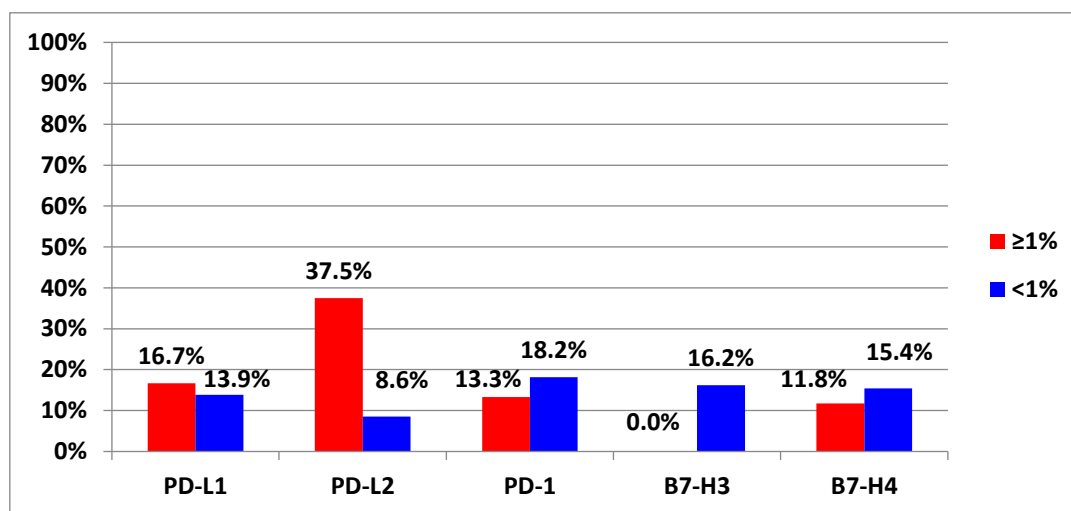

Supplementary Figure S1. Correlation between RECIST-ORR and biomarkers expression in the Nivolumab cohort. No statistically significant interaction was observed between each biomarker and ORR, although the correlation between PD-L2 expression and RECIST-ORR was close to significance ( $p$ -value = 0.067).

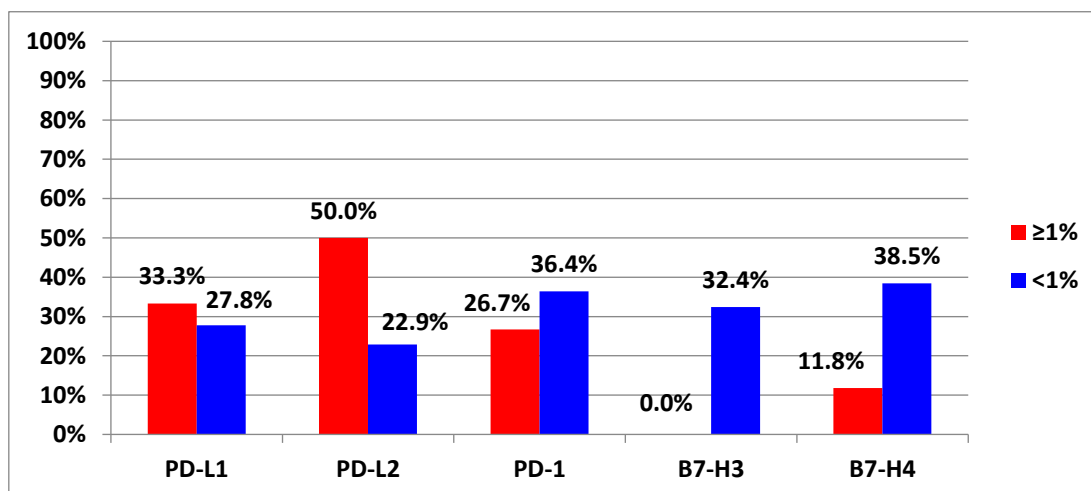

Supplementary Figure S2. Correlation between RECIST-DCR and biomarkers expression in the Nivolumab cohort. No statistically significant interaction was observed between each biomarker and DCR, although the correlation between B7-H4 expression and RECIST-DCR was close to significance ( $p$ -value = 0.085).

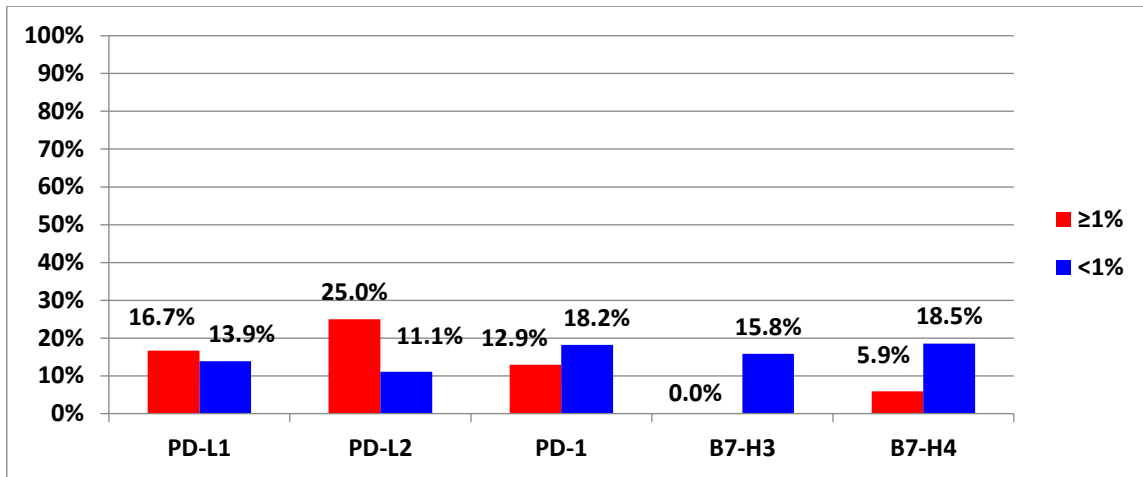

**Supplementary Figure S3.** Correlation between immune-related response criteria (irRC)-ORR and biomarkers expression in the Nivolumab cohort. irRC-ORR according to biomarkers expression at IHC in the Nivolumab Cohort. No statistically significant interaction was observed between each biomarker and ORR.

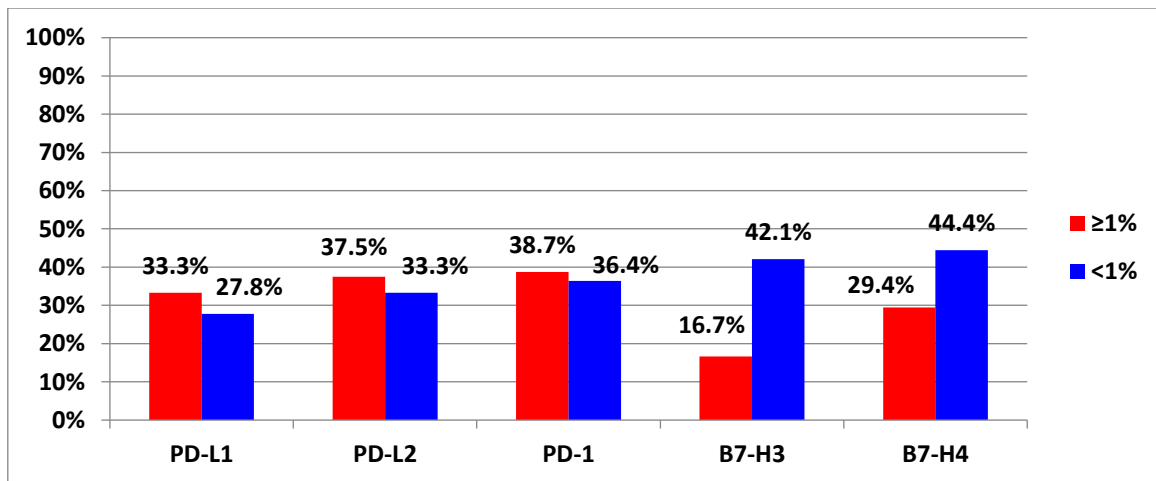

**Supplementary Figure S4.** Correlation between irRC-DCR and biomarkers expression in the Nivolumab cohort. No significant interaction was observed between each biomarker and DCR.

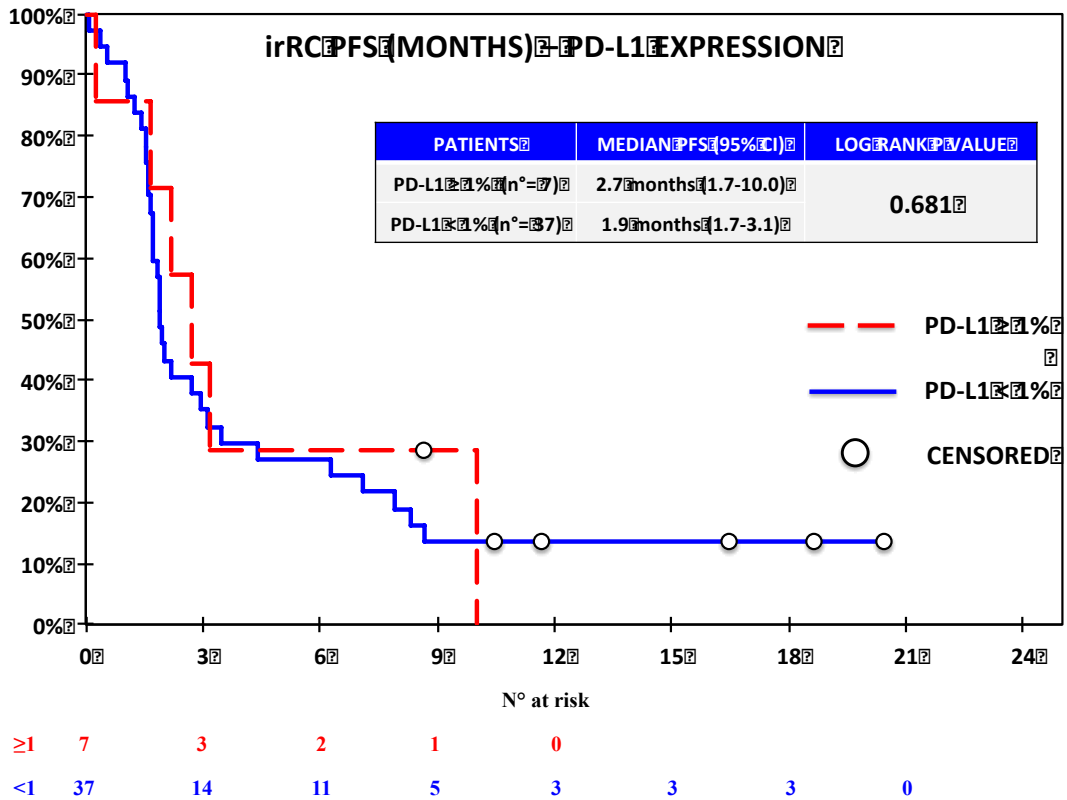

**Supplementary Figure S5.** irRC-PFS based on the expression of PD-L1 defined as  $\geq 1\%$  vs.  $< 1\%$  in the Nivolumab Cohort. No significant difference was observed on the basis of PD-L1 expression.

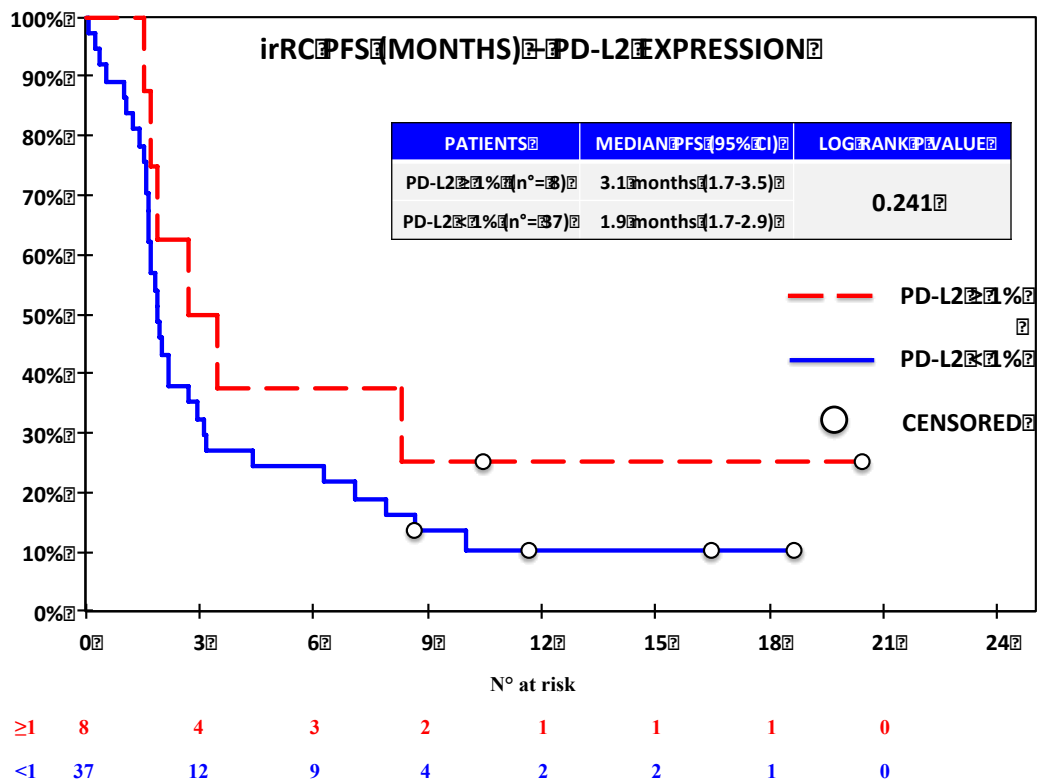

**Supplementary Figure 6.** irRC-PFS based on the expression of PD-L2 defined as  $\geq 1\%$  vs.  $< 1\%$  in the Nivolumab Cohort. No significant difference was observed on the basis of PD-L2 expression.

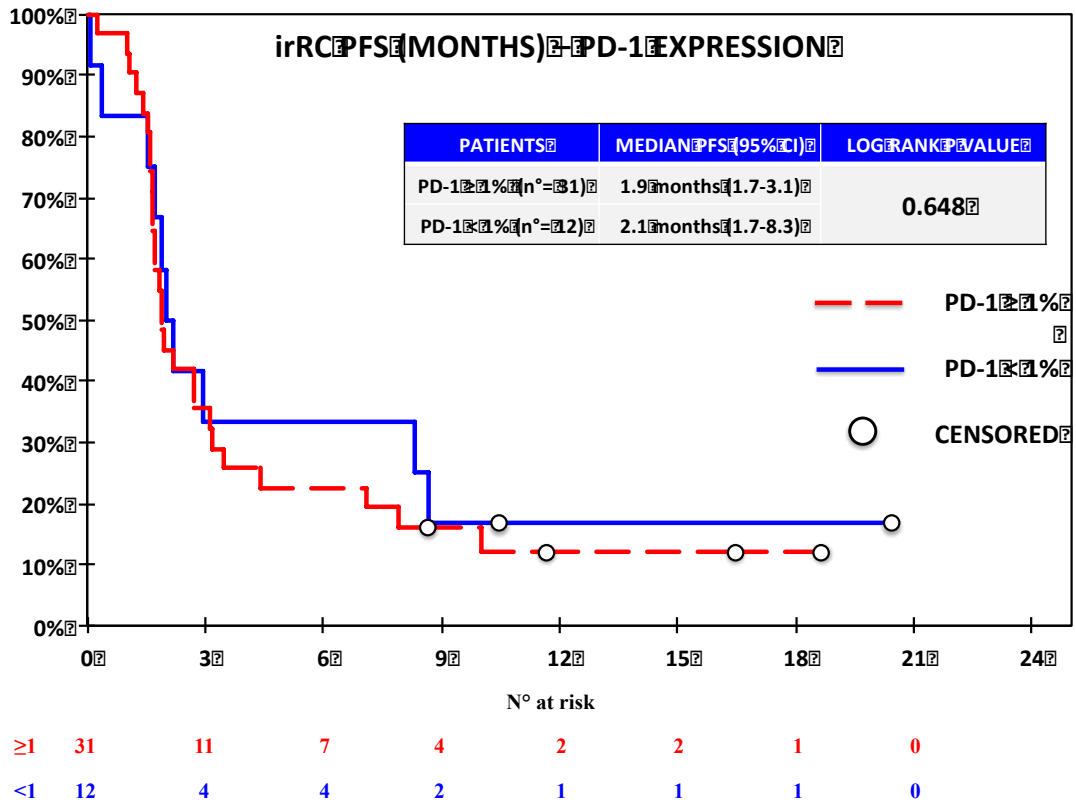

**Supplementary Figure S7.** irRC-PFS based on the expression of PD-1 defined as  $\geq 1\%$  vs.  $< 1\%$  in the Nivolumab Cohort. No significant difference was observed on the basis of PD-1 expression.

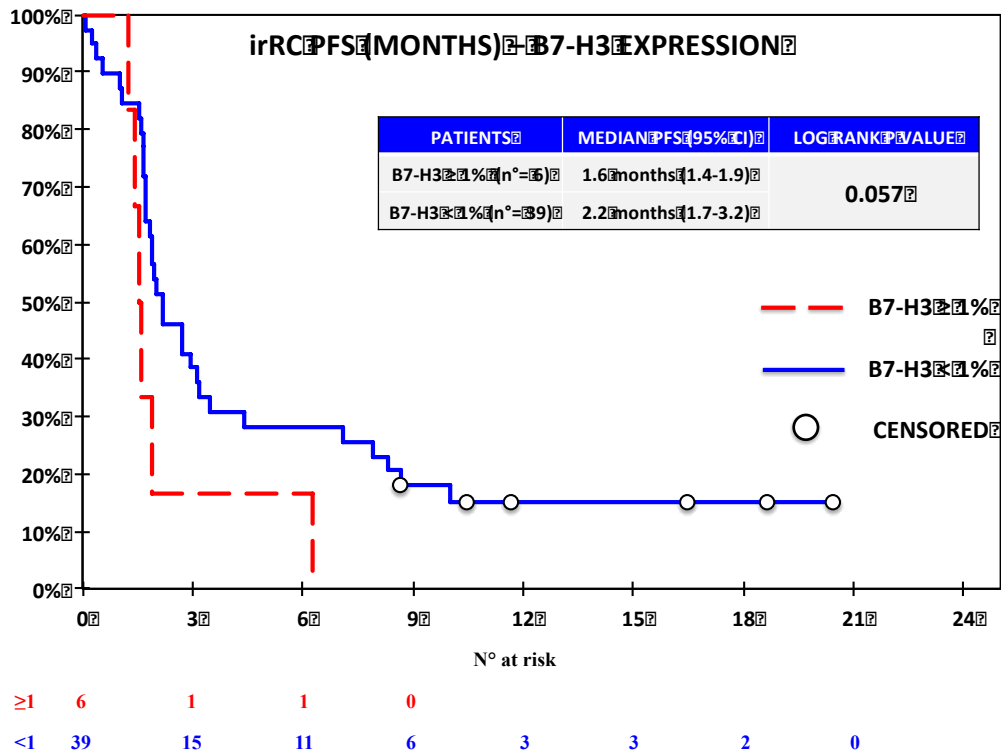

**Supplementary Figure S8.** irRC-PFS based on the expression of B7-H3 defined as  $\geq 1\%$  vs.  $< 1\%$  in the Nivolumab Cohort. irRC-PFS difference based on B7-H3 expression fell short of statistical significance ( $p$ -value = 0.057); while this result should be considered with caution due to the fact that only six out of 44 patients expressed B7-H3, the rapid progression of B7-H3-expressing patients was noteworthy.

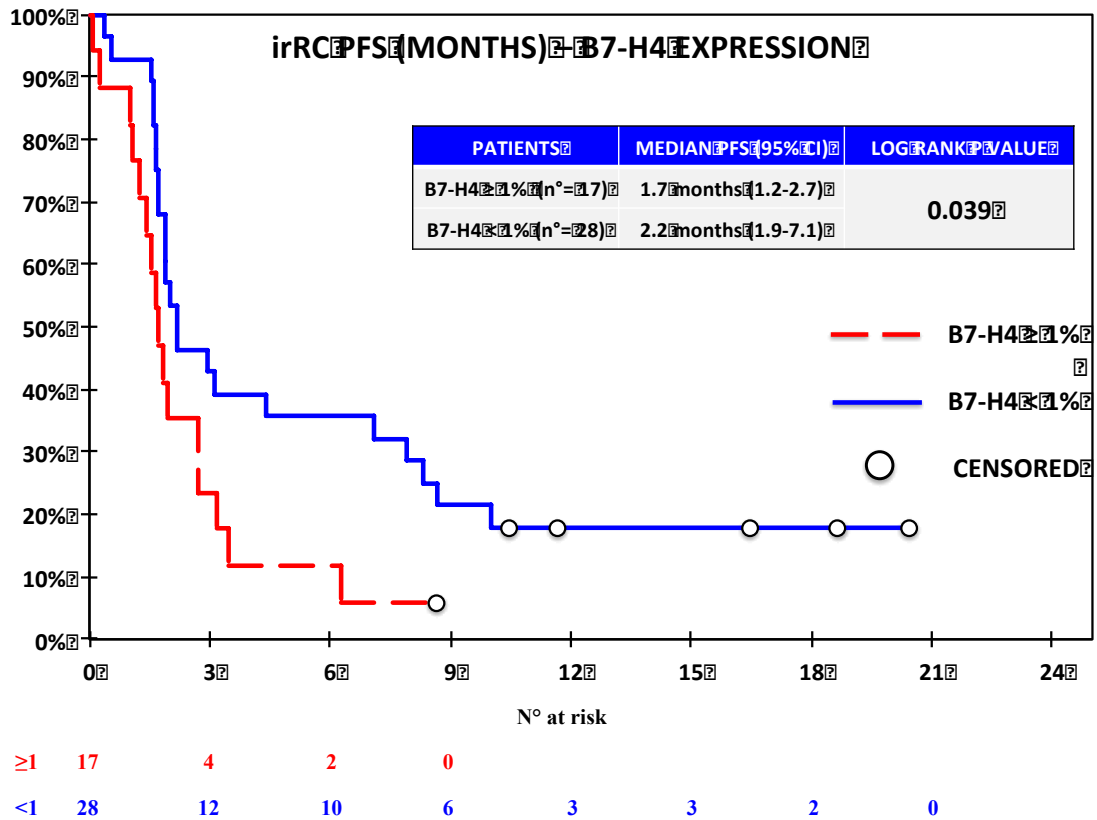

**Supplementary Figure S9.** irRC-PFS based on the expression of B7-H4 defined as  $\geq 1\%$  vs.  $< 1\%$  in the Nivolumab Cohort. The expression of B7-H4 was significantly associated with shorter PFS.

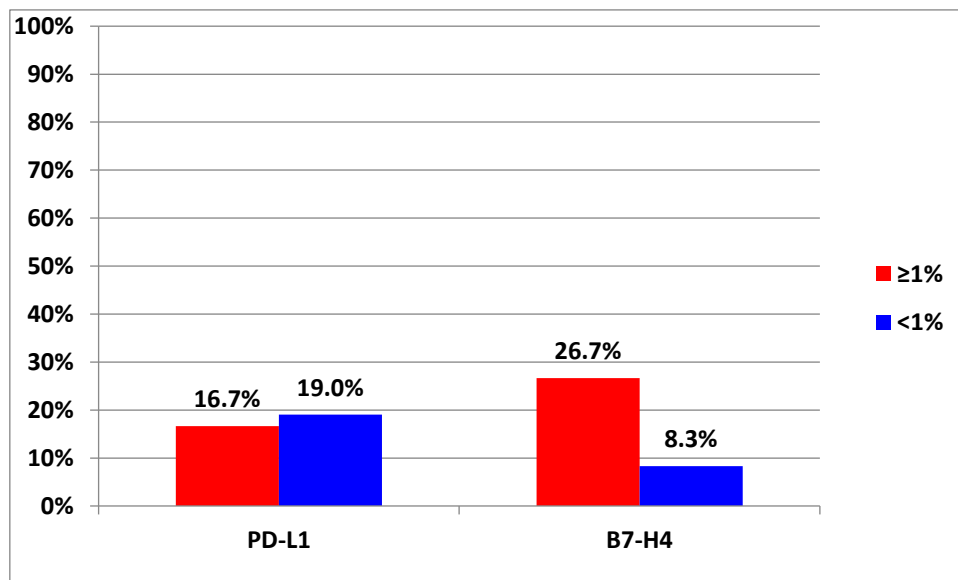

**Supplementary Figure S10.** Correlation between RECIST-ORR and biomarkers expression in the Chemotherapy cohort. No significant interaction was observed between each biomarker and ORR.



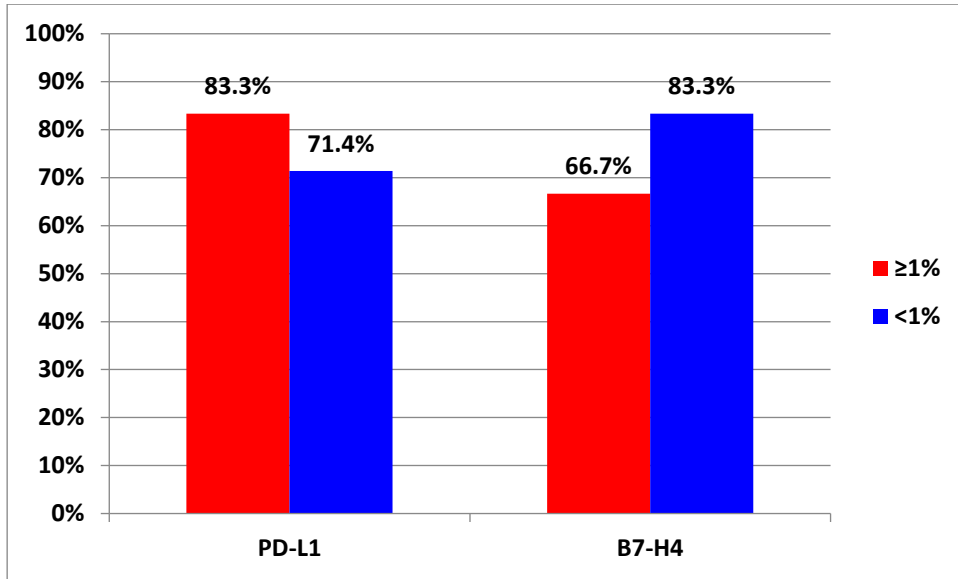

**Supplementary Figure S11.** Correlation between RECIST-DCR and biomarkers expression in the Chemotherapy cohort. No significant interaction was observed between each biomarker and DCR.
